# Supplementary material for: Chitosan coated alginate micro particles for the oral delivery of antifilarial drugs and combinations for intervention in Brugia malayi induced lymphatic filariasis
Source: Royal Society of Chemistry journal article supplement (doi:10.1039/c5ra06982c), 2015-01-01
Supplement: c5ra06982c1.pdf [file c5ra06982c1.pdf]

**Figure SI:** Morphology of microparticles prepared by spray drying and observed by digital optical microscopy (X40).(A&B): Optical Micrographs of DEC & DOX Mps Uncrosslinked (C& D) Microscopic images of Chi-DEC MPs & Chi-DOX

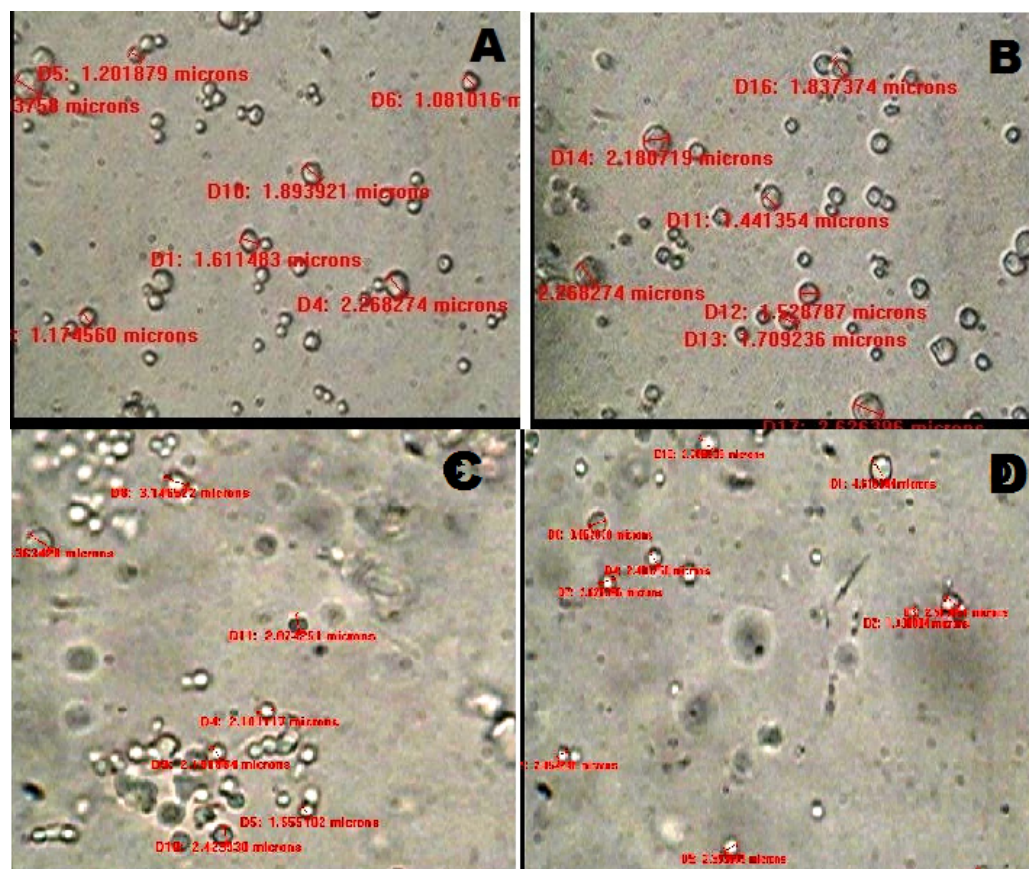

**Table S1. Particle size distribution and Zeta potential of spray-dried microparticles determined by laser diffraction (n = 3), expressed as volume mean diameter, D (μm).**

| <b>Batch No.</b> | <b>D[v, 10] μm</b> | <b>D[v, 50] μm</b> | <b>D[v, 90] μm</b> | <b>Zeta Potential(mV)</b> |
|------------------|--------------------|--------------------|--------------------|---------------------------|
| DEC MPs          | 3.552± 0.61        | 4.412± 0.78        | 5.688± 0.54        | -28.8± 0.79               |
| Chi-DEC MPs      | 3.549± 0.65        | 4.605± 0.59        | 5.690± 0.55        | +27.1±0.85                |
| DOX MPs          | 3.655± 0.68        | 4.418± 0.56        | 5.677± 0.56        | -25.8± 0.88               |
| Chi-DOX MPs      | 3.055± 0.75        | 4.740± 0.56        | 7.020± 0.59        | +29.6±0.85                |
| Blank MPs        | 3.461± 0.80        | 4.588± 0.91        | 5.719± 0.65        | -31.9±0.55                |

Data represented as mean ± S.D (n=3). D[v, 10] ;diameter is the diameter at which 10% of a sample's mass is comprised of smaller particles. D [v, 50]; is the diameter at which 50% of a sample's mass is comprised of smaller particles. D[v, 90] is the diameter at which 90% of a sample's mass is comprised of smaller particles

**Table S2. Size, zeta potential and Drug entrapment of formulation stability conditions at different temperature conditions after Six months.**

| Formulation | Temperature(°C)&<br>Relative Humidity % | Drug Entrapment (%) |                | Particle size ± SD (µm) |                | Zeta potential (mV) |                |
|-------------|-----------------------------------------|---------------------|----------------|-------------------------|----------------|---------------------|----------------|
|             |                                         | Initial             | After 6 months | Initial                 | After 6 months | Initial             | After 6 months |
| Chi-DEC MPs | 2-8°C                                   | 41.28±1.5           | 41.11±1.5      | 4.81±0.5                | 4.89±0.59      | +27.6±0.28          | +27.8±0.59     |
|             | 25 °C / 60% RH                          | 41.56±1.7           | 41.22±1.6      | 4.83±0.6                | 4.83±0.68      | +27.7±0.37          | +27.9±0.61     |
|             | 40°C / 75% RH                           | 40.56±1.8           | 39.86±1.8      | 4.83±0.8                | 4.83±0.81      | +27.5±0.63          | +27.3±0.79     |
|             |                                         |                     |                |                         |                |                     |                |
| Chi-DOX MPs | 2-8°C                                   | 43.51±1.9           | 43.0±1.7       | 4.79±0.7                | 4.79±0.78      | +29.4±0.41          | +29.6±0.49     |
|             | 25 °C / 60% RH                          | 44.62±1.8           | 44.32±1.9      | 4.93±0.8                | 4.93±0.83      | +29.7±0.49          | +29.5±0.51     |
|             | 40°C / 75% RH                           | 42.51±2.0           | 40.91±1.9      | 5.3±0.8                 | 5.3±0.88       | +28.9±0.69          | +29.2±0.87     |
|             |                                         |                     |                |                         |                |                     |                |

**Table S3. *In vitro* antifilarial activity of Formulated DEC, DOX and DEC+ DOX on adult *B. malayi* and microfilariae , determined after 48 hrs**

| <b>Dosage</b>                    | <b>Activity on Adult</b> |                                    |                                    |           | <b>Activity on mf</b>  |                                    |                       |
|----------------------------------|--------------------------|------------------------------------|------------------------------------|-----------|------------------------|------------------------------------|-----------------------|
|                                  | <b>MIC<sup>#</sup></b>   | <b>IC<sub>50</sub><sup>#</sup></b> | <b>CC<sub>50</sub><sup>#</sup></b> | <b>SI</b> | <b>MIC<sup>#</sup></b> | <b>IC<sub>50</sub><sup>#</sup></b> | <b>SI<sup>#</sup></b> |
| <b>Chi-DEC MPs</b>               | 25                       | 4.2                                | >100                               | >23.8     | 25                     | 3.5                                | >28.57                |
| <b>Chi-DOX MPs</b>               | 10                       | 3.75                               | >100                               | >26.66    | 10                     | 2.0                                | >45                   |
| <b>Chi-DEC MPs + Chi-DOX MPs</b> | (25 DEC<br>+10 DOX)      | 2.10                               | >100                               | >47.62    | 2.5                    | 1.9                                | >55.63                |

#concentration in  $\mu\text{M}$

**Table S4. *In vitro* motility scoring and % inhibition in MTT reduction results of Formulated DEC, DOX and DEC+ DOX on adult *B. malayi* and microfilariae (n=3), was determined at 24 h.**

| Drugs                               | Conc. $\mu\text{M}$                           | Adult worm       |                               | Motility scoring Mf |
|-------------------------------------|-----------------------------------------------|------------------|-------------------------------|---------------------|
|                                     |                                               | Motility scoring | % inhibition in MTT reduction |                     |
| <b>Chi-DEC MPs</b>                  | 25                                            | D                | 70.2 $\pm$ 2.8                | D                   |
|                                     | 10                                            | 1+               | 41.5 $\pm$ 1.6                | 1+                  |
|                                     | 5                                             | 1+               | 30.4 $\pm$ 3.2                | 1+                  |
|                                     | 2.5                                           | 2+               | 12.2 $\pm$ 2.4                | 1+                  |
|                                     | 1.25                                          | 2+               | 10.5 $\pm$ 2.1                | 2+                  |
| <b>Chi-DOX MPs</b>                  | 10                                            | D                | 65.5 $\pm$ 3.8                | D                   |
|                                     | 5                                             | 1+               | 50 $\pm$ 4.2                  | D                   |
|                                     | 2.5                                           | 1+               | 20.6 $\pm$ 1.8                | 1+                  |
|                                     | 1.25                                          | 2+               | 18.9 $\pm$ 3.6                | 2+                  |
|                                     | 0.62                                          | 2+               | 18 $\pm$ 1.2                  | 2+                  |
| <b>Chi-DEC MPs+<br/>Chi-DOX MPs</b> | 25 $\mu\text{M}$ DEC +10 $\mu\text{M}$ DOX    | D                | 82.5 $\pm$ 3.2                | D                   |
|                                     | 10 $\mu\text{M}$ DEC + 5 $\mu\text{M}$ DOX    | 1+               | 52 $\pm$ 1.8                  | D                   |
|                                     | 5 $\mu\text{M}$ DEC + 2.5 $\mu\text{M}$ DOX   | 2+               | 40.9 $\pm$ 3.6                | 1+                  |
|                                     | 2.5 $\mu\text{M}$ DEC+1.25 $\mu\text{M}$ DOX  | 2+               | 22 $\pm$ 1.4                  | 1+                  |
|                                     | 1.25 $\mu\text{M}$ DEC +0.6 $\mu\text{M}$ DOX | 2+               | 14 $\pm$ 2.8                  | 2+                  |

#Scored as 0% motility reduction (4+); 1–49% motility reduction (3+); 50–74% motility reduction (2+); 75–99% motility reduction (1+) and D represents 100% motility reduction (Dead).

**Table S5. R<sup>2</sup> value of different release kinetic models**

| <b>Formulation<br/>Batch</b> | <b>Zero order<br/>R<sup>2</sup></b> | <b>First<br/>order R<sup>2</sup></b> | <b>Korsmeyer-<br/>peppas R<sup>2</sup></b> | <b>Higuchi<br/>R<sup>2</sup></b> | <b>Hixson crowell<br/>R<sup>2</sup></b> | <b>Weibull<br/>R<sup>2</sup></b> |
|------------------------------|-------------------------------------|--------------------------------------|--------------------------------------------|----------------------------------|-----------------------------------------|----------------------------------|
| Chi-DEC-MPs                  | 0.9652                              | 0.9848                               | 0.9864                                     | 0.9209                           | 0.9889                                  | 0.9900                           |
| Chi-DOX-MPs                  | 0.9726                              | 0.9879                               | 0.9907                                     | 0.9213                           | 0.9923                                  | 0.9941                           |
